# Supplementary material for: Innate immune reconstitution with suppression of HIV-1
Source: JCI journal article supplement (doi:10.1172/jci.insight.85433), 2016-03-16

## Supplementary Materials

Supplemental Table 1: Clinical details on individual study subjects. The pre-treatment CD4 count reflects the value closest to the initiation of ART. For all study subjects, this was the first start of therapy. Samples examined in the study were in the months surrounding therapy initiation, with a range of 8-24 months.

| Subject | Year of enrollment | Pre-treatment CD4 | Year of treatment | ART regimen                 |
|---------|--------------------|-------------------|-------------------|-----------------------------|
| A1      | 2002               | 284               | 2009              | EFV,FTC,TDF,RAL             |
| A2      | 2007               | 185               | 2010              | FTC,TDF,RAL                 |
| A3      | 2008               | 554               | 2008              | EFV,FTC,TDF                 |
| A4      | 2010               | 593               | 2010              | EFV,FTC,TDF                 |
| A5      | 2004               | 799               | 2004              | EFV,FTC,TDF                 |
| A6      | 2004               | 293               | 2004              | AZT/3TC/LOP/RTV             |
| A7      | 2005               | 229               | 2006              | EFV,AZT,3TC                 |
| A8      | 2004               | 338               | 2005              | AZT/3TC/ABC/TDF/FUZ/TIP/RTV |

Abbreviation list: EFV=efavirenz, FTC=emtricitabine, TDF=tenofovir, RAL=raltegravir, AZT=zidovudine, 3TC=lamivudine, LOP=lopinavir, RTV=ritonavir, ABC=abacavir, FUZ=enfuvirtide, TIP=tipranavir

Supplemental Table S2. Antibody clones and volume of antibody used for staining in all panels including T cell activation, monocyte subsets, and intracellular cytokine staining as detailed in the Methods section. All staining done in a volume of ~100uL with cell count ranging between 0.5 to 1.5 x 10<sup>6</sup> cells depending on the experiment.

| <b>Antibody</b>                       | <b>Clone</b> | <b>Volume</b> |
|---------------------------------------|--------------|---------------|
| <b>HLA-DR PerCP</b>                   | L243         | 6uL           |
| <b>HLA-DR PB</b>                      | L243         | 1uL           |
| <b>TNF-<math>\alpha</math> PE-Cy7</b> | MAb11        | 3uL           |
| <b>IL-1<math>\beta</math> PE</b>      | CRM56        | 1uL           |
| <b>CD3 AF700</b>                      | UCHT1        | 1uL           |
| <b>CD4 PB</b>                         | RPA-T4       | 0.5uL         |
| <b>CD8 PE-Cy7</b>                     | SK1          | 4uL           |
| <b>CD11c APC</b>                      | V S143       | 6uL           |
| <b>CD14 APC-Cy7</b>                   | MphiP9       | 1uL           |
| <b>CD19 AF700</b>                     | HIB19        | 2uL           |
| <b>CD25 APC</b>                       | M-A251       | 8uL           |
| <b>CD38 PE</b>                        | HB7          | 8uL           |
| <b>CD56 AF700</b>                     | B159         | 2uL           |
| <b>CD69 FITC</b>                      | FN50         | 6uL           |
| <b>CD123 PE-Cy5</b>                   | 9F5          | 6uL           |

**Supplemental Table S3.** Antibody clones and commercial sources of CHIP grade antibodies used for chromatin immunoprecipitation experiments.

| <b>Antibody</b>                      | <b>Millipore Reference number</b> |
|--------------------------------------|-----------------------------------|
| Anti-acetylated Histone 4            | 06-866                            |
| Anti-trimethyl Histone 3 (lysine 4)  | 17-164                            |
| Anti-monomethyl Histone 3 (lysine 9) | 17-680                            |
| Anti-trimethyl Histone 3 (lysine 27) | 07-449                            |

**Supplemental Figure S1. Multivariate analysis of culture supernatants can discriminate between samples from viremic and suppressed timepoints.** PLSDA was used to discriminate between samples derived from high viremia (1, blue) and viral suppression to <400 copies/mL (2, pink). Models were able to classify the samples with a single canonical value (Canon-1, on the x-axis, unique for each stimulant). Model performance estimates predicted classification accuracy of 84% (LPS), 86%(Curdlan), and 85%(NOD) with lower performance for HKLM (71%). Iterative exclusion of random subsets of the data was used to test model predictions. Over 10 iterations of the model, average predictive accuracy values were 87% (LPS), 88%(Curdlan), and 84% (NOD). HKLM had less consistent model performance, with 74% accuracy

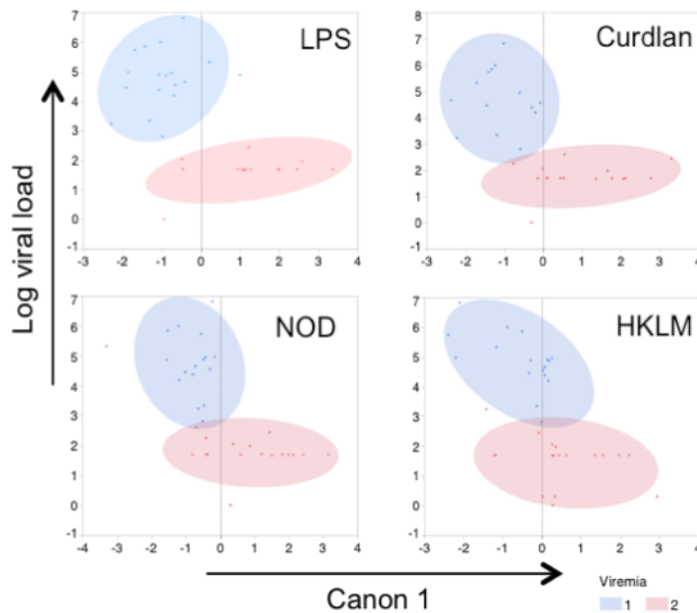

**Supplemental Figure S2.** mDC subset distribution at viremic and suppressed timepoints. Median fluorescence intensity (MFI) of CD86, a costimulatory molecule, on total mDCs (CD3/19/56 negative, CD14 negative and CD11c positive) and on the portion of mDCs co-expressing HLA-DR was compared between viremic and suppressed timepoints. There was no significant difference between these timepoints (mean and standard deviation of MFI values shown, n=7,  $p>0.05$ , Mann-Whitney U).

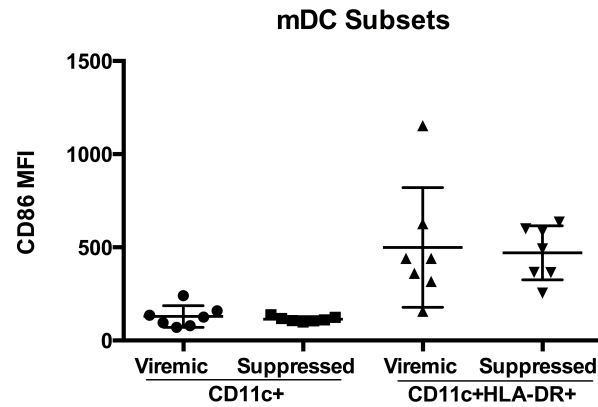

**Supplemental Figure S3. Histone modifications at the TNF $\alpha$  promoter.** Summary data from two independent sample preparations and three immunoprecipitations documenting the fold change in histone modifications across the promoter site. Of note, median data for H4 acetylation at the TNF4 locus site was limited to only a single experiment. Data represented are the median (line) and range (min to max).

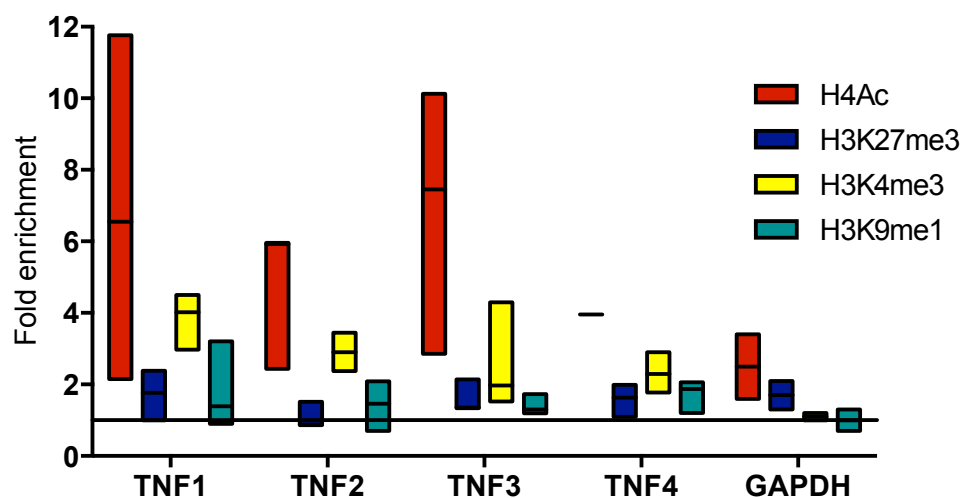

**Supplemental Figure S4. Gating strategy for intracellular cytokine staining.** All sample timepoints from any individual study participant were thawed, cultured and analyzed on the same day.

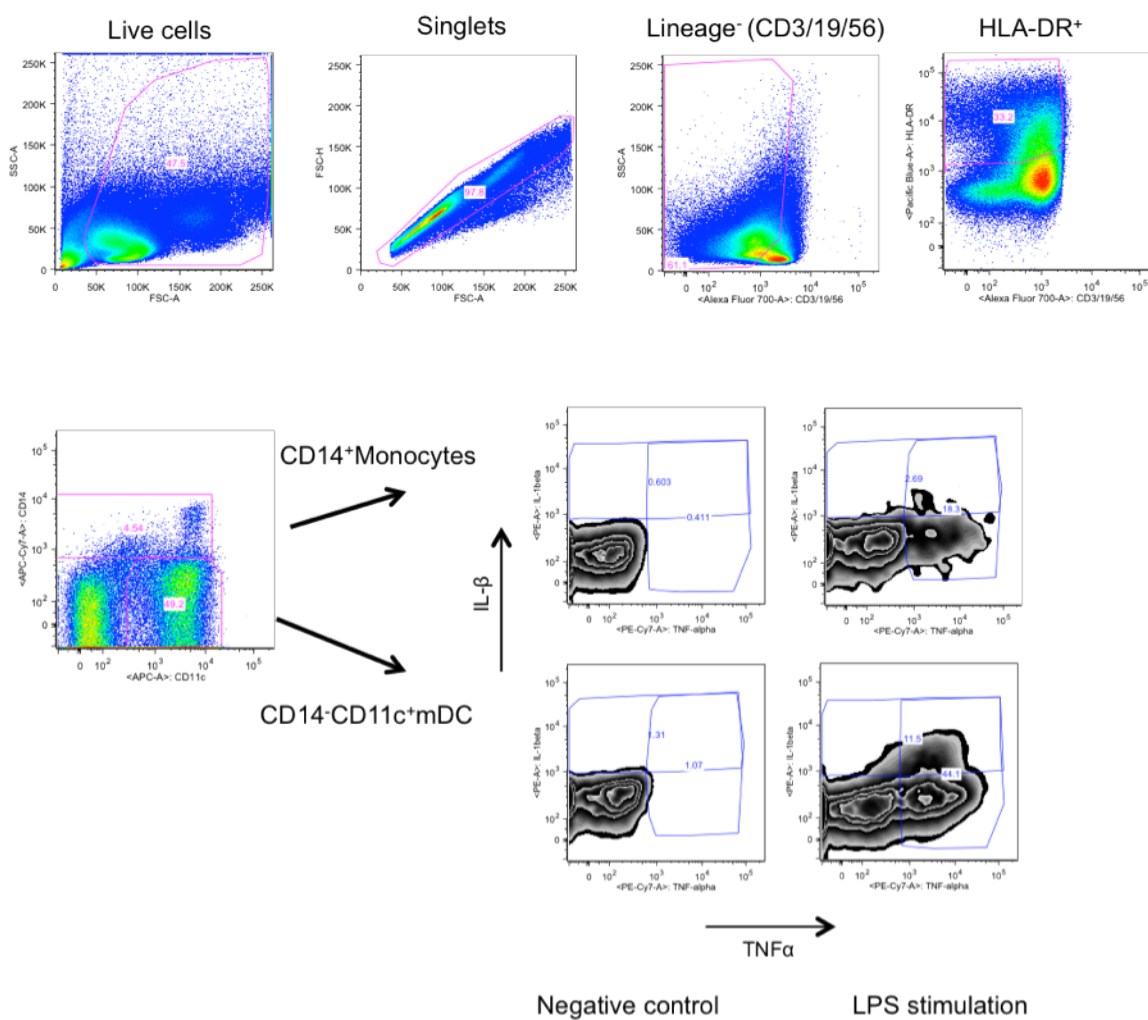

Supplement: sd1 [file 1]
